# Supplementary material for: Synthesis and photoactivity enhancement of ZnWO4 photocatalysts doped with chlorine
Source: Royal Society of Chemistry journal article supplement (doi:10.1039/c2ce26005k), 2012-01-01
Supplement: c2ce26005k.pdf [file c2ce26005k.pdf]

## Supplementary data

# Synthesis and Photoactivity Enhancement of ZnWO<sub>4</sub> Photocatalysts Doped with Chlorine

Guangli Huang<sup>a,b</sup> and Yongfa Zhu<sup>a\*</sup>

<sup>a</sup> Department of chemistry, Tsinghua University, Beijing 100084, P. R China

<sup>b</sup> Beijing Tobacco Quality Supervision and Test Station, Beijing 100029, P. R. China

---

\* \* To whom correspondence should be addressed. Tel: +86-10-62783586; Fax: +86-10-62787601;

Email: [zhuyf@tsinghua.edu.cn](mailto:zhuyf@tsinghua.edu.cn) (Y.F. Zhu);

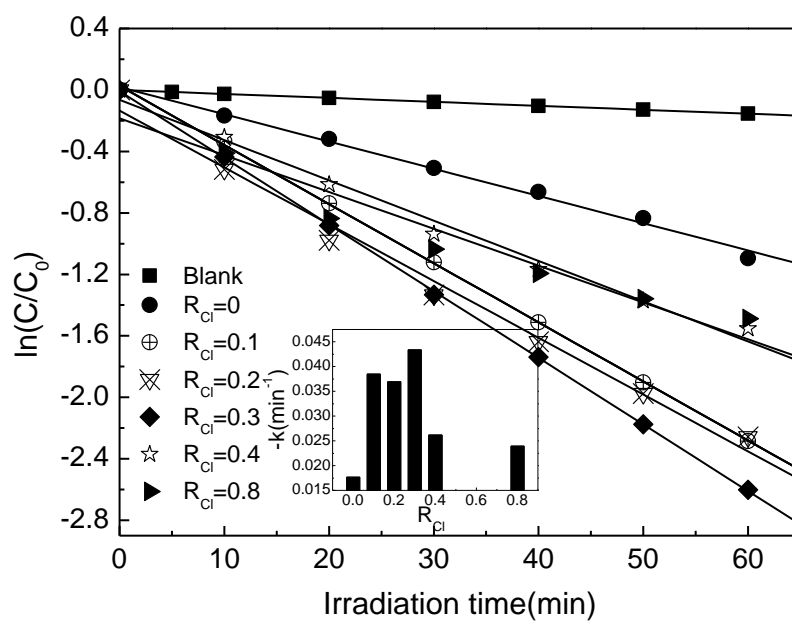

**Fig. S1** The photocatalytic activities of various samples doped with different chlorine concentrations and the dependence of the apparent rate constants ( $k/\text{min}^{-1}$ ) and Cl amount (inset). Catalyst loading,  $0.50 \text{ g L}^{-1}$ ; RhB,  $1.0 \times 10^{-5} \text{ mol L}^{-1}$ .

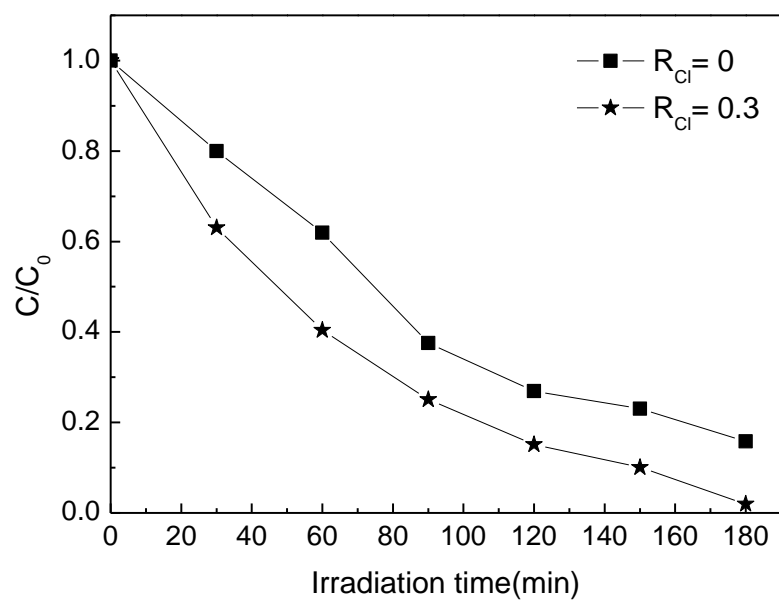

**Fig.S2** The photocatalytic degradation of 4-chlorophenol over as-prepared samples.

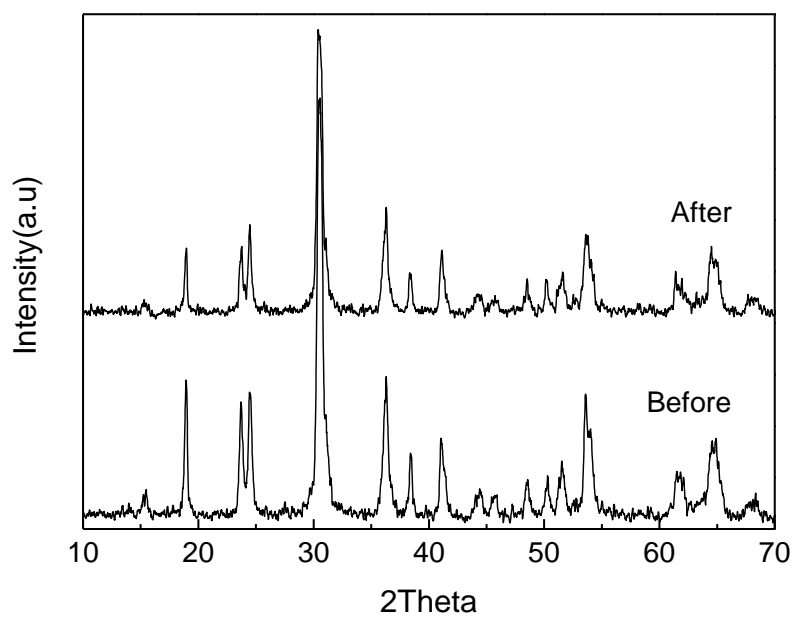

**Fig. S3** A comparison of XRD patterns of  $\text{ZnWO}_4$  ( $R_{\text{Cl}} = 0.3$ ) doped with chlorine before and after photocatalytic reactions.
